# Supplementary material for: Photodetection Tuning with High Absorptivity Using Stacked 2D Heterostructure Films
Source: Nanomaterials (Basel). 2022 Feb 21;12(4):712. doi: 10.3390/nano12040712 (PMC8876593; doi:10.3390/nano12040712)
Supplement: Supplementary file 1 [file nanomaterials-12-00712-s001.zip › nanomaterials-1566637-supplementary.pdf]

# Photodetection Tuning with High Absorptivity Using Stacked 2D Heterostructure Films

Umar Farooq <sup>1,†</sup>, Kossi A. A. Min-Dianey <sup>2,†</sup>, Pandey Rajagopalan <sup>3,†</sup>, Muhammad Malik <sup>4,†</sup>,  
Damgou Mani Kongnine <sup>2,†</sup>, Jeong Ryeol Choi <sup>5,\*</sup> and Phuong V. Pham <sup>6,\*</sup>

<sup>1</sup> Paul C. Lauterbur Research Center for Biomedical Imaging, Institute of Biomedical and Health Engineering, Shenzhen Institutes of Advanced Technology, Chinese Academy of Sciences, 1068 Xueyuan Avenue, Shenzhen 518055, China; farooq@siat.ac.cn

<sup>2</sup> Department of Physics, Laboratoire Sur l'Energie Solaire, Université de Lomé, Lomé 01BP1515, Togo; anyaratt20@yahoo.fr (K.A.A.M.-D.); kongnine@gmail.com (D.M.K.)

<sup>3</sup> International Joint Innovation Center, Zhejiang University, Haining 314400, China; rajagopalanpandey@gmail.com

<sup>4</sup> Department of Electrical Engineering and Technology, Government College University, Faisalabad 38000, Pakistan; mmalik@gcuf.edu.pk

<sup>5</sup> Department of Nanoengineering, Kyonggi University, Suwon 16227, Korea

<sup>6</sup> SKKU Advanced Institute of Nano Technology, Sungkyunkwan University, Suwon 440-746, Korea

\* Correspondence: jrchoi@kyonggi.ac.kr (J.R.C.); pvphuong@skku.edu (P.V.P.)

† These authors contributed equally to this work.

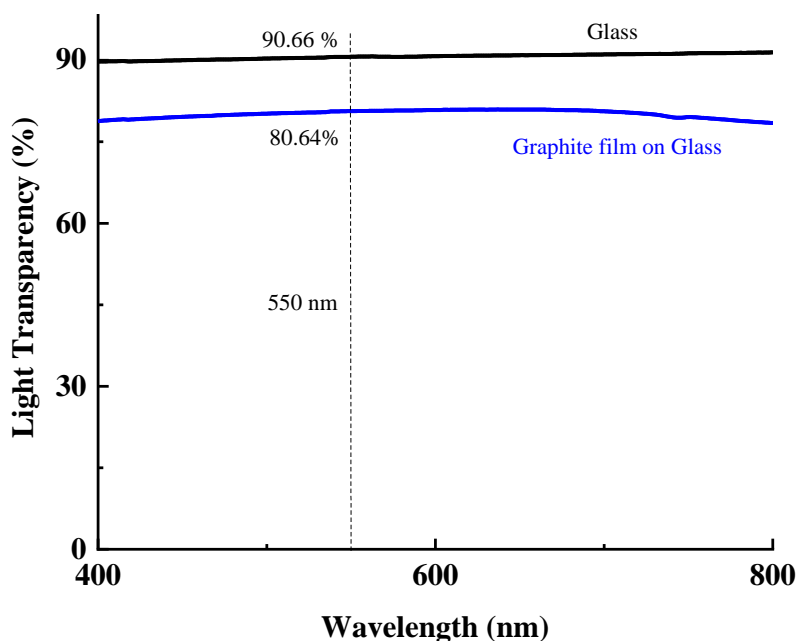

**Figure S1.** Light transparency of glass and intrinsic graphite film (15 nm thick)/glass.

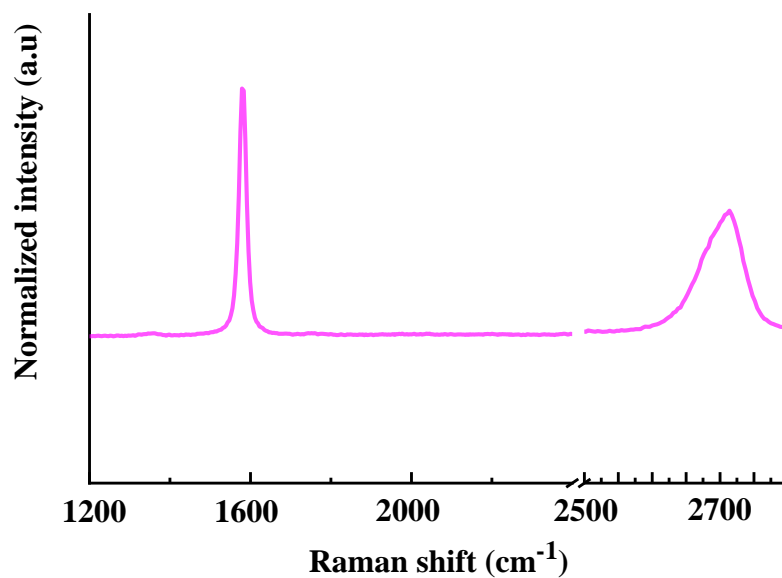

**Figure S2.** Raman spectra of intrinsic graphite film (15 nm thick).

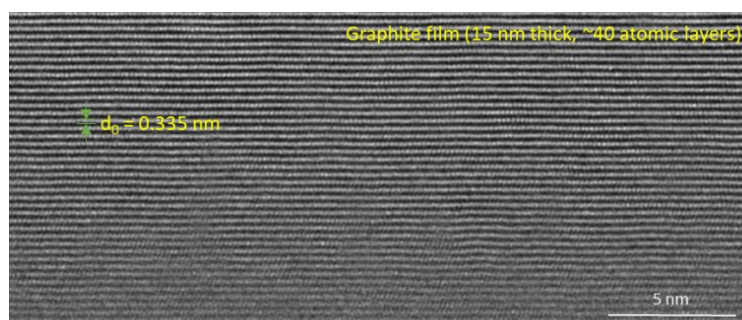

**Figure S3.** Cross-sectional TEM image of intrinsic graphite film (15 nm thick, >40 atomic layers).

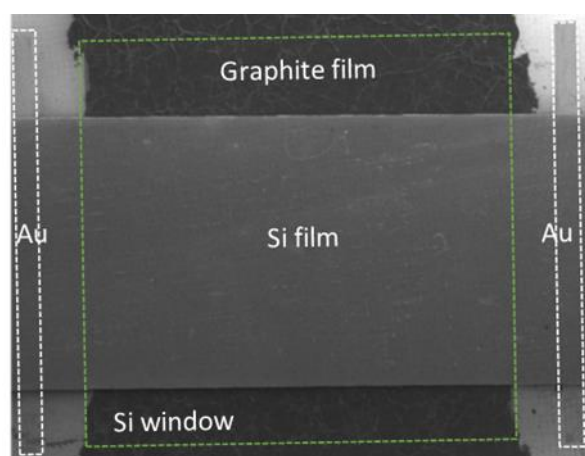

**Figure S4.** SEM image of Si film/graphite film/Si-stacked photodetection (PD) device.

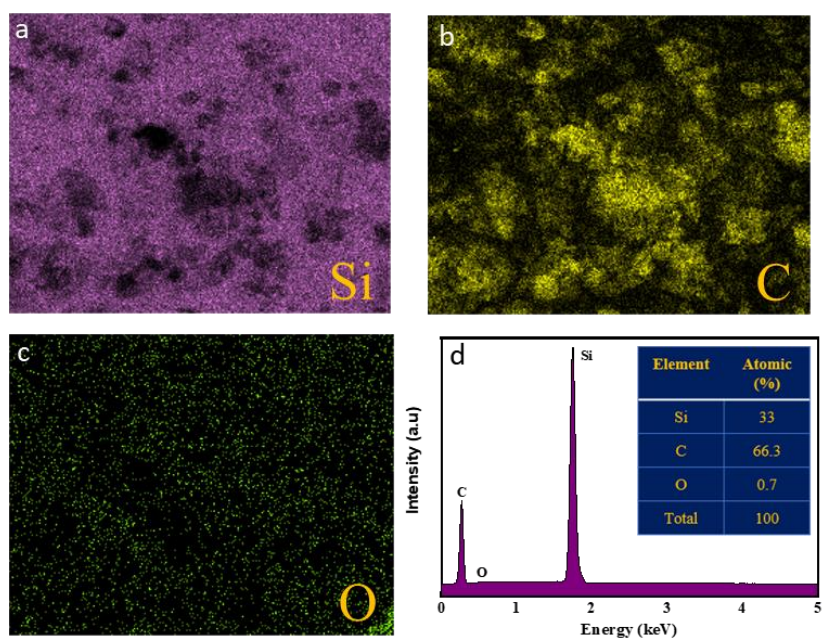

**Figure S5.** Energy dispersive X-ray spectroscopy (EDS) mapping and images of Si, O, and C elements of graphite film (15 nm thick) transferred on n-type Si substrate.

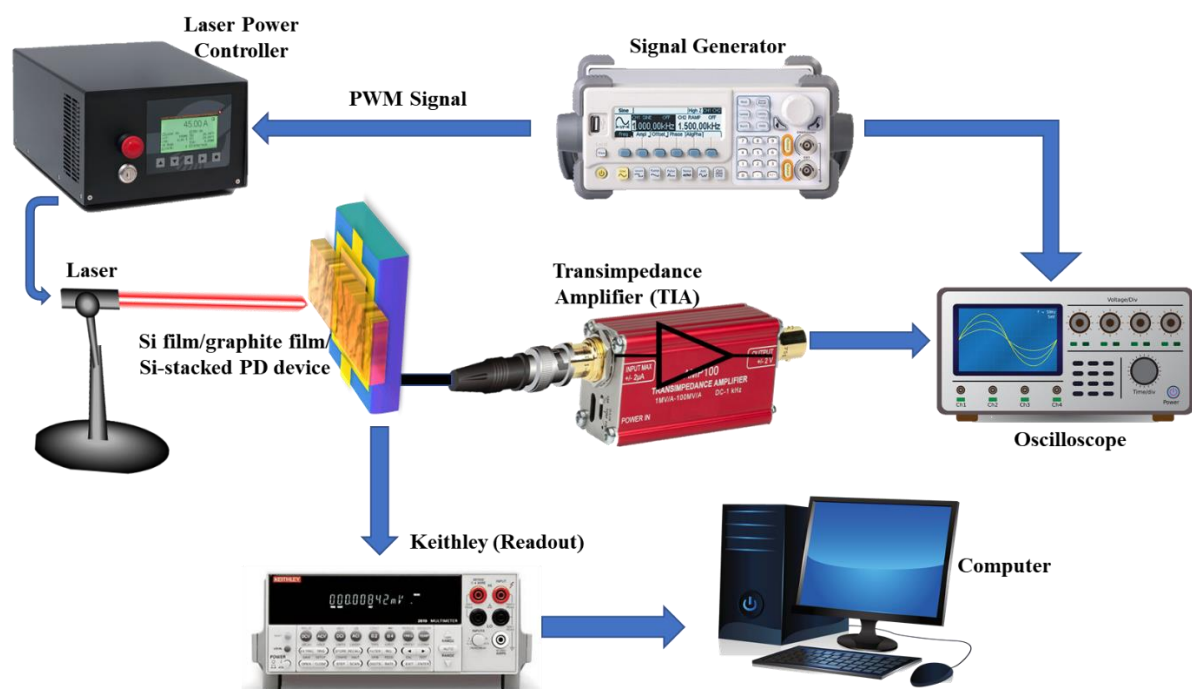

**Figure S6.** Schematic of the laser system setup for the measurement of characterizations in visible region of p-type Si film/graphite film/n-type Si-stacked Schottky photodiode.
